# Supplementary material
Source: Springer Nature journal article supplement (https://www.springermedizin.de/resource/supplementary/12985_2009_675_MOESM2_ESM.pdf/9608246)
Supplement: MOESM2 [file 9608246]

## A. AstV-VA2

|              |      |      |  |
|--------------|------|------|--|
| VEL/CRI32927 |      |      |  |
| VEL/CRI35159 | 98.6 |      |  |
| STL/WD0680   | 95.2 | 95.6 |  |
| VEL/CRI32927 |      |      |  |
| VEL/CRI35159 |      |      |  |
| STL/WD0680   |      |      |  |

## B. AstV-MLB2

|              |      |      |      |      |  |
|--------------|------|------|------|------|--|
| VEL/CRI38351 |      |      |      |      |  |
| VEL/CRI41435 | 100  |      |      |      |  |
| STL/WD0410   | 98.6 | 98.6 |      |      |  |
| STL/WD0559   | 98.4 | 98.4 | 98.8 |      |  |
| STL/WD0681   | 98.4 | 98.4 | 99.3 | 98.6 |  |
| VEL/CRI38351 |      |      |      |      |  |
| VEL/CRI41435 |      |      |      |      |  |
| STL/WD0410   |      |      |      |      |  |
| STL/WD0559   |      |      |      |      |  |
| STL/WD0681   |      |      |      |      |  |
